# Supplementary material
Source: PubMed Central journal article supplement (PMC6392032)
Supplement: NIHMS1521660-supplement-Supporting_Information.pdf [file NIHMS1521660-supplement-Supporting_Information.pdf]

Copyright WILEY-VCH Verlag GmbH & Co. KGaA, 69469 Weinheim, Germany, 2016.

## Supporting Information

### **A Photoresponsive Hyaluronan Hydrogel Nanocomposite for Dynamic Immunomodulation**

*Haoyu Wang, Renee-Tyler Tan Morales, Xin Cui, Jiongxian Huang, Weiyi Qian, Jie Tong, Weiqiang Chen\**

#### **This Supporting Information includes:**

Supplemental Figures (Fig. S1-S8) with the captions.

## Supplemental Figure S1

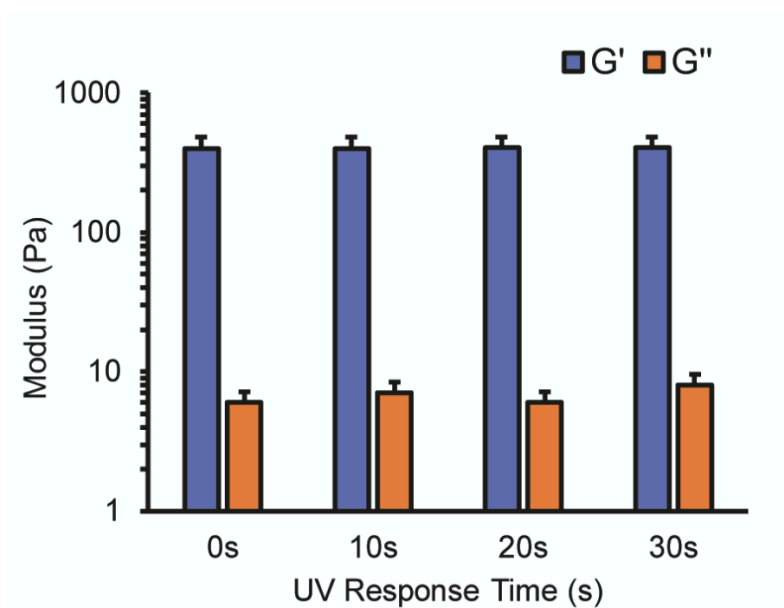

**Figure S1.** The storage ( $G'$ ) and loss modulus ( $G''$ ) of photo-triggered HA-APP hydrogels. 3-D HA-APP hydrogels underwent photo-controlled RGD peptide release and conjugation for a total 30-second UV exposure time. The moduli were measured with a plate-to-plate rheometer at a constant strain of 0.05 with frequency ranging from 0.1 to 10 rad/s. The data are shown as the mean  $\pm$ SEM, with the mean represented as averages of  $G'$  and  $G''$  over the frequency range.

**Supplemental Figure S2**

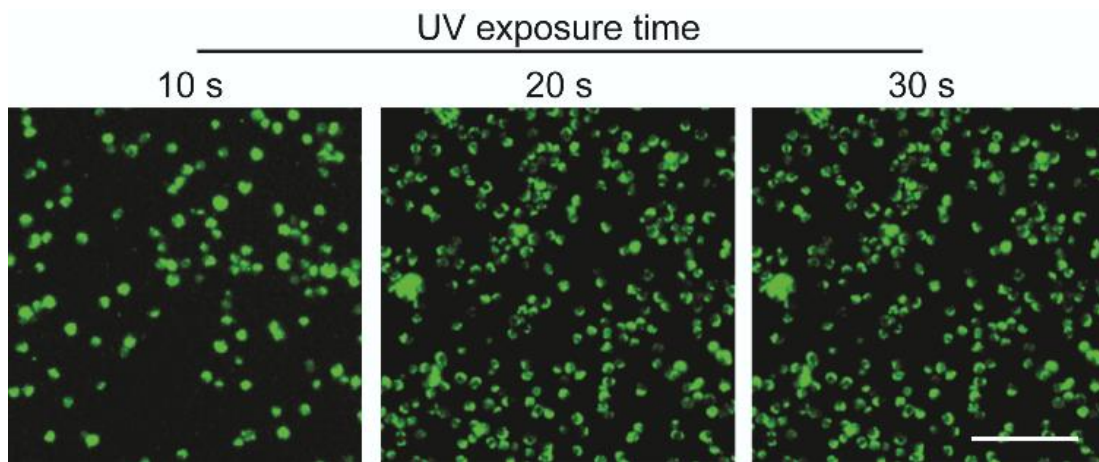

**Figure S2.** Viability of RAW 264.7 M0 macrophages encapsulated in 3-D HA-APP hydrogels. Live/Dead viability images after 10s, 20s, and 30s of one-time UV exposure during which viability remains consistently high (> 95%). Scale bar is 200  $\mu\text{m}$ .

### Supplemental Figure S3

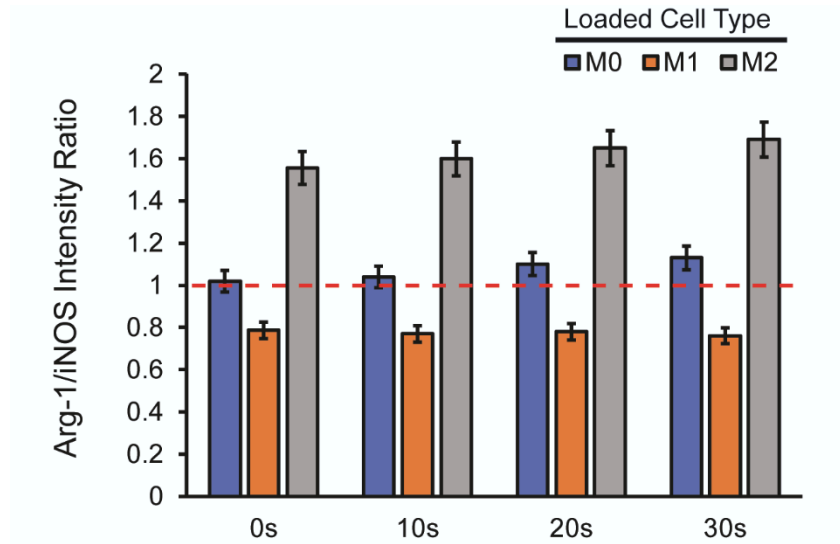

**Figure S3.** UV exposure alone does not alter macrophage phenotype. Quantified intensity ratio of Arg-1/iNOS in inactivated M0 macrophages and pre-polarized M1 and M2 RAW264.7 macrophages after 72hr encapsulation in 3-D HA hydrogels for different UV exposure times. The data are shown as the mean  $\pm$ SEM. Error bars represent  $\pm$  S.E.M. from 3 independent experiments.

## Supplemental Figure S4

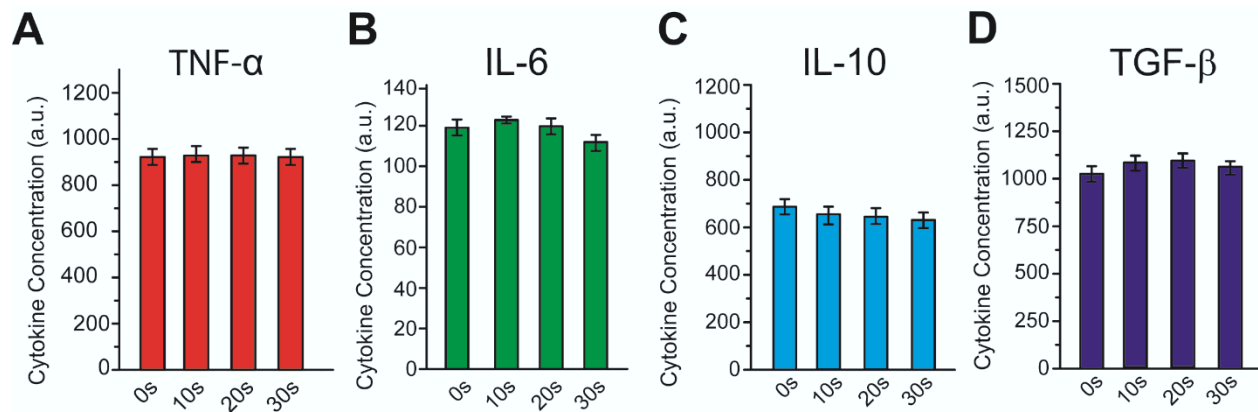

**Figure S4.** UV exposure alone does not alter macrophage phenotype. Immunoassay levels of proinflammatory cytokines, TNF- $\alpha$  (A) and IL-6 (B), and anti-inflammatory cytokines IL-10 (C) and TGF- $\beta$  (D) secreted by M0 macrophages in 3-D HA hydrogels treated with increasing one-time UV exposure after 72hrs. The data are shown as the mean  $\pm$ SEM. Error bars represent  $\pm$  S.E.M. from 3 independent experiments.

Supplemental Figure S5

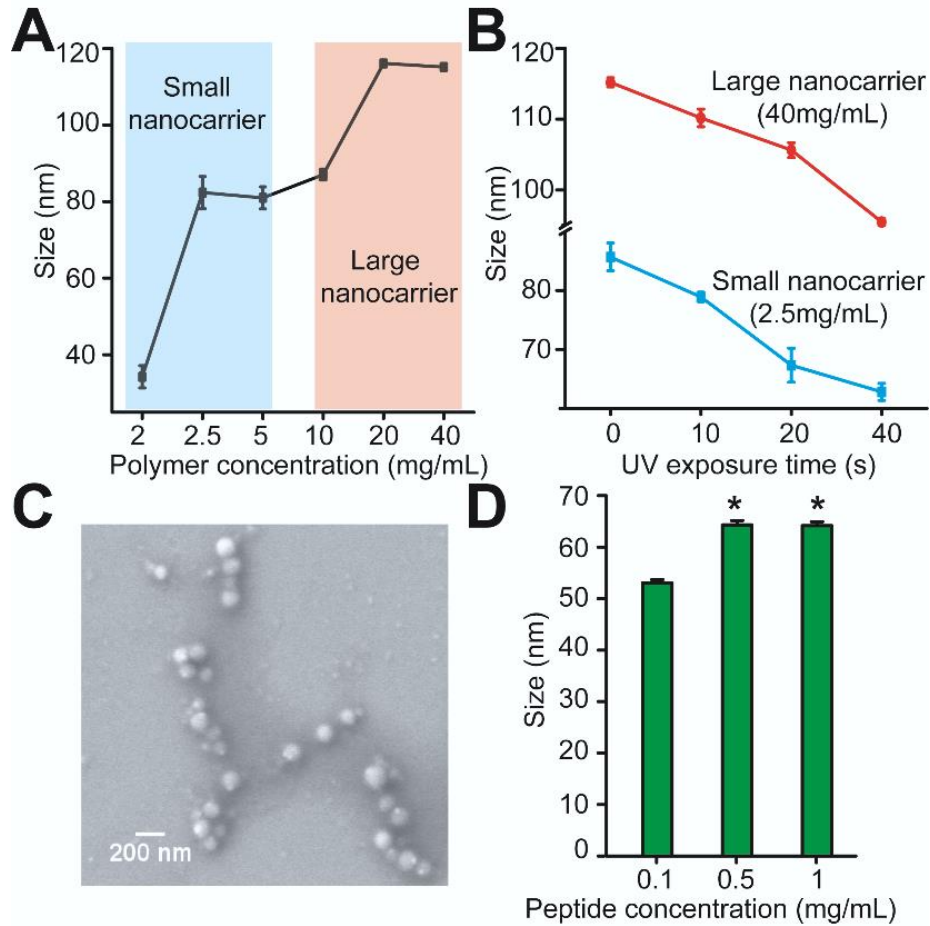

**Figure S5.** APP nanocomposites characterization. Size characterization of small and large APP nanocomposites based on (A) APP polymer concentration and (B) one-time UV exposure time. (C) representative SEM image of APP nanocomposites. Scale bar is 200 nm. (D) Size characterization of APP nanocomposites for increasing load of  $\alpha v \beta 3$  integrin-specific RGD peptides. The data are shown as the mean  $\pm$ SEM (\*,  $p < 0.05$ ). Error bars represent  $\pm$  S.E.M. from 3 independent experiments.

## Supplemental Figure S6

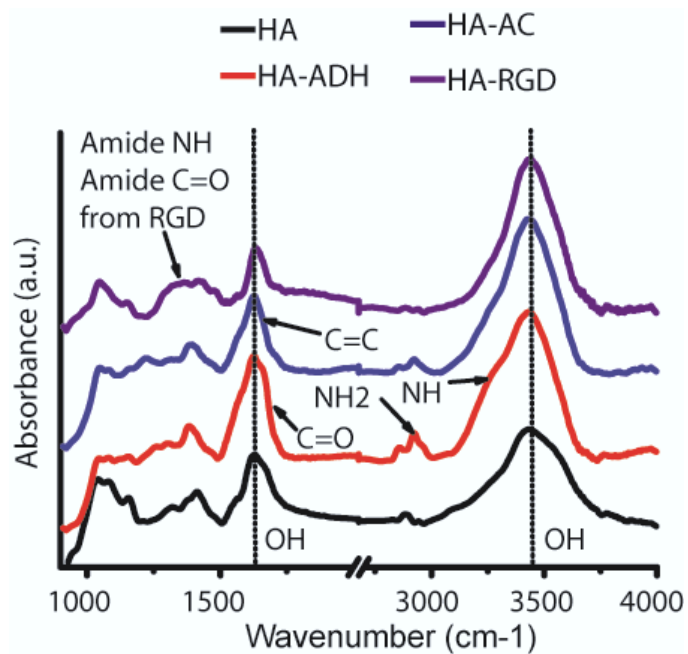

**Figure S6.** IR spectrum of HA-Ac Macromer synthesis from HA, HA-ADH and HA-Ac intermediate steps, as well as photo-controlled RGD peptide conjugation onto HA-Ac macromer.

## Supplemental Figure S7

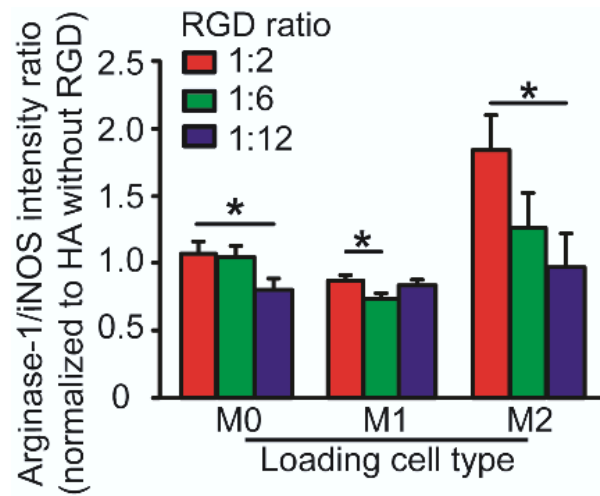

**Figure S7.** Dose-dependent integrin  $\alpha\beta3$  activation promotes M2 macrophage polarization. Quantified as a fluorescent intensity ratio, Arg-1/iNOS marker expressions of M0, M1 and M2 RAM264.7 macrophages after 72 hr encapsulation in 3-D, static HA hydrogels pre-conjugated with different ratios of RGD peptides. The data are shown as the mean  $\pm$ SEM (\*,  $p < 0.05$ ). Error bars represent  $\pm$  S.E.M. from 3 independent experiments.



## Supplemental Figure S8

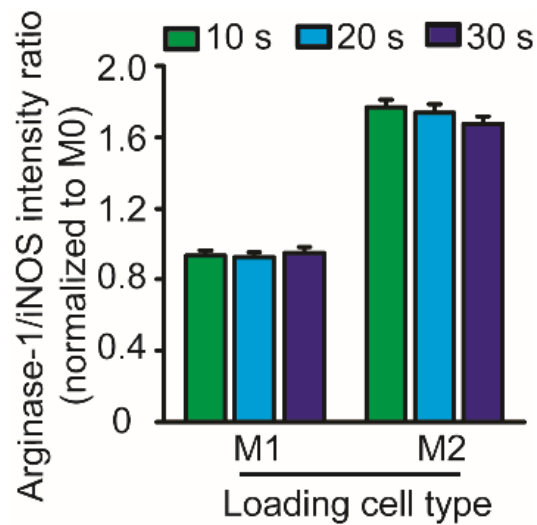

**Figure S8.** APP nanocomposites without RGD peptide loading cannot alter macrophage phenotype. Quantified intensity ratio of Arg-1/iNOS in polarized M1 and M2 RAW264.7 macrophages after 72hr encapsulation in 3-D HA hydrogels with empty APP nanocomposites and different UV exposure. The data are shown as the mean  $\pm$ SEM. Error bars represent  $\pm$  S.E.M. from 3 independent experiments.
